# Supplementary material for: Influenza D Virus: Serological Evidence in the Italian Population from 2005 to 2017
Source: PubMed Central journal article supplement (PMC7019439; doi:10.3390/v12010030), 2019-12-27
Supplement: viruses-12-00030-s001.pdf [file viruses-12-00030-s001.pdf]

## Supplementary file

Table S1. Serum samples collected in Italy from 2005 to 2017.

| Year       | 2005  | 2006 | 2007 | 2008 | 2009 | 2010 | 2011 | 2012 | 2013 | 2014 | 2015 | 2016 | 2017 |    |
|------------|-------|------|------|------|------|------|------|------|------|------|------|------|------|----|
| Samples    | 99    | 101  | 82   | 95   | 101  | 83   | 101  | 102  | 100  | 100  | 101  | 115  | 101  |    |
| Age groups | 18-30 | 10   | 13   | 7    | 10   | 16   | 7    | 14   | 16   | 7    | 9    | 15   | 10   | 10 |
|            | 31-40 | 19   | 14   | 14   | 18   | 17   | 14   | 18   | 19   | 16   | 15   | 16   | 16   | 17 |
|            | 41-50 | 14   | 14   | 14   | 14   | 15   | 14   | 13   | 11   | 19   | 24   | 15   | 27   | 25 |
|            | 51-60 | 18   | 15   | 15   | 16   | 18   | 16   | 16   | 18   | 18   | 16   | 12   | 20   | 19 |
|            | 61-70 | 18   | 13   | 14   | 17   | 13   | 15   | 14   | 12   | 20   | 13   | 18   | 18   | 12 |
|            | 71-80 | 14   | 14   | 11   | 14   | 14   | 11   | 16   | 14   | 14   | 10   | 17   | 14   | 10 |
|            | ≥81   | 6    | 18   | 7    | 6    | 8    | 6    | 10   | 12   | 6    | 13   | 8    | 10   | 8  |
| Sex        | M     | 50   | 52   | 41   | 48   | 55   | 43   | 49   | 52   | 50   | 50   | 51   | 50   | 51 |
|            | F     | 49   | 49   | 41   | 47   | 46   | 40   | 52   | 50   | 50   | 50   | 50   | 65   | 50 |

Table S2 Results of the multiple proportion test among years.

| Assay | Titre class | Chi-squared | df | p value  |
|-------|-------------|-------------|----|----------|
| HI    | negative    | 131.22      | 12 | < 0.0001 |
|       | ≥1:10       | 131.22      | 12 | < 0.0001 |
|       | ≥1:20       | 86.31       | 12 | < 0.0001 |
|       | ≥1:40       | 34.95       | 12 | 0.0005   |
| VN    | ≥1:10       | 105.78      | 12 | < 0.0001 |
|       | ≥1:20       | 86.32       | 12 | < 0.0001 |
|       | ≥1:40       | 23.32       | 12 | 0.02     |

Table S3. Multiple comparisons of proportions of positive titres ( $\geq 1:10$ ,  $\geq 1:20$ ) for HI and VN assays along the period 2005-2017.

| HI positive titres ( $\geq 1:10$ ) |           |                 | HI positive titres ( $\geq 1:20$ ) |           |                 | VN positive titres ( $\geq 1:10$ ) |           |                 | VN positive titres ( $\geq 1:20$ ) |           |                 |
|------------------------------------|-----------|-----------------|------------------------------------|-----------|-----------------|------------------------------------|-----------|-----------------|------------------------------------|-----------|-----------------|
| <i>value</i>                       | <i>CR</i> | <i>contrast</i> | <i>value</i>                       | <i>CR</i> | <i>contrast</i> | <i>value</i>                       | <i>CR</i> | <i>contrast</i> | <i>value</i>                       | <i>CR</i> | <i>contrast</i> |
| 0.33                               | 0.25      | 2005-2008       | 0.29                               | 0.24      | 2005-2008       | 0.31                               | 0.25      | 2005-2008       | 0.31                               | 0.24      | 2005-2008       |
| 0.35                               | 0.24      | 2005-2009       | 0.23                               | 0.22      | 2005-2009       | 0.28                               | 0.24      | 2005-2009       | 0.25                               | 0.23      | 2005-2013       |
| 0.38                               | 0.27      | 2005-2010       | 0.27                               | 0.23      | 2005-2013       | 0.34                               | 0.25      | 2005-2013       | 0.31                               | 0.24      | 2005-2014       |
| 0.36                               | 0.25      | 2005-2013       | 0.26                               | 0.23      | 2005-2014       | 0.36                               | 0.25      | 2005-2014       | 0.28                               | 0.25      | 2006-2008       |
| 0.41                               | 0.25      | 2005-2014       | 0.31                               | 0.23      | 2007-2008       | 0.22                               | 0.21      | 2005-2016       | 0.28                               | 0.25      | 2006-2014       |
| 0.29                               | 0.23      | 2005-2016       | 0.26                               | 0.21      | 2007-2009       | 0.29                               | 0.25      | 2006-2008       | 0.28                               | 0.25      | 2008-2017       |
| 0.30                               | 0.26      | 2006-2008       | 0.30                               | 0.22      | 2007-2013       | 0.26                               | 0.24      | 2006-2009       | 0.28                               | 0.25      | 2014-2017       |
| 0.32                               | 0.25      | 2006-2009       | 0.29                               | 0.22      | 2007-2014       | 0.32                               | 0.25      | 2006-2013       |                                    |           |                 |
| 0.35                               | 0.28      | 2006-2010       | 0.22                               | 0.19      | 2007-2016       | 0.34                               | 0.25      | 2006-2014       |                                    |           |                 |
| 0.33                               | 0.26      | 2006-2013       |                                    |           |                 | 0.29                               | 0.27      | 2007-2013       |                                    |           |                 |
| 0.38                               | 0.26      | 2006-2014       |                                    |           |                 | 0.31                               | 0.27      | 2007-2014       |                                    |           |                 |
| 0.26                               | 0.24      | 2006-2016       |                                    |           |                 | 0.28                               | 0.26      | 2013-2017       |                                    |           |                 |
| 0.28                               | 0.27      | 2007-2008       |                                    |           |                 | 0.30                               | 0.27      | 2014-2017       |                                    |           |                 |
| 0.30                               | 0.27      | 2007-2009       |                                    |           |                 |                                    |           |                 |                                    |           |                 |
| 0.34                               | 0.29      | 2007-2010       |                                    |           |                 |                                    |           |                 |                                    |           |                 |
| 0.31                               | 0.27      | 2007-2013       |                                    |           |                 |                                    |           |                 |                                    |           |                 |
| 0.36                               | 0.27      | 2007-2014       |                                    |           |                 |                                    |           |                 |                                    |           |                 |
| 0.31                               | 0.29      | 2010-2017       |                                    |           |                 |                                    |           |                 |                                    |           |                 |
| 0.28                               | 0.27      | 2013-2017       |                                    |           |                 |                                    |           |                 |                                    |           |                 |
| 0.33                               | 0.27      | 2014-2017       |                                    |           |                 |                                    |           |                 |                                    |           |                 |

Table shows differences in proportions, the corresponding critical value from the Marascuilo procedure (CR), and years compared. A difference greater than the CR indicates a statistically significant result. Only the significant differences for each class of positive titres in both assays are reported.

Figure S1. VN vs. HI: normalized proportions and trend lines for the titre class  $\geq 1:10$ .

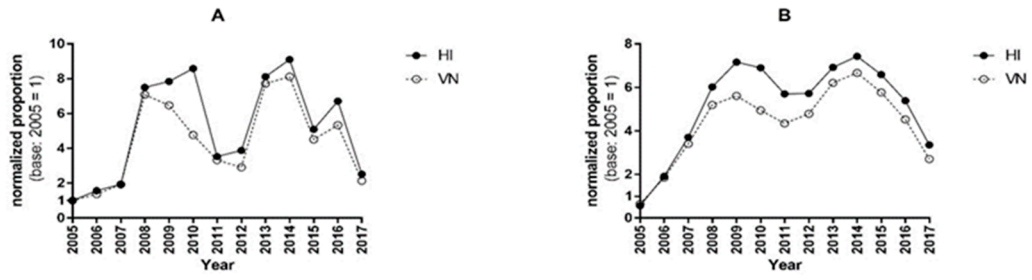

Panel A: Time series of the normalized proportions of positive ( $\geq 1:10$ ) titres of VN assay (empty black dots) compared to the time series of the HI assay (black filled dots).

Panel B: Trend curves related to the normalized proportions of positive ( $\geq 1:10$ ) titres for the VN assay (empty black dots) and the HI assay (black filled dots).
